# Supplementary material for: Variants in the Plasmacytoma Variant Translocation Gene (PVT1) Are Associated With End-Stage Renal Disease Attributed to Type 1 Diabetes
Source: Oxford University Press journal article supplement (doi:10.2337/db07-0675), 2007-09-20
Supplement: db070675supplementaryfigurelegends.doc [file db070675supplementaryfigurelegends.doc]

Figure 1. Estimation of pairwise linkage disequilibrium in A)GoKinD study participants and B) Pima Indians. Values for D’ and r2 were estimated for the 24 SNPs typed in each study sample and are depicted above and below the diagonal, respectively.
